# Supplementary material
Source: publisher site journal article supplement (https://www.dovepress.com/article/548334)
Supplement: Supplementary file 1 [file Suplementary%20material%2020250912_1.pdf]

# Supplementary material

A

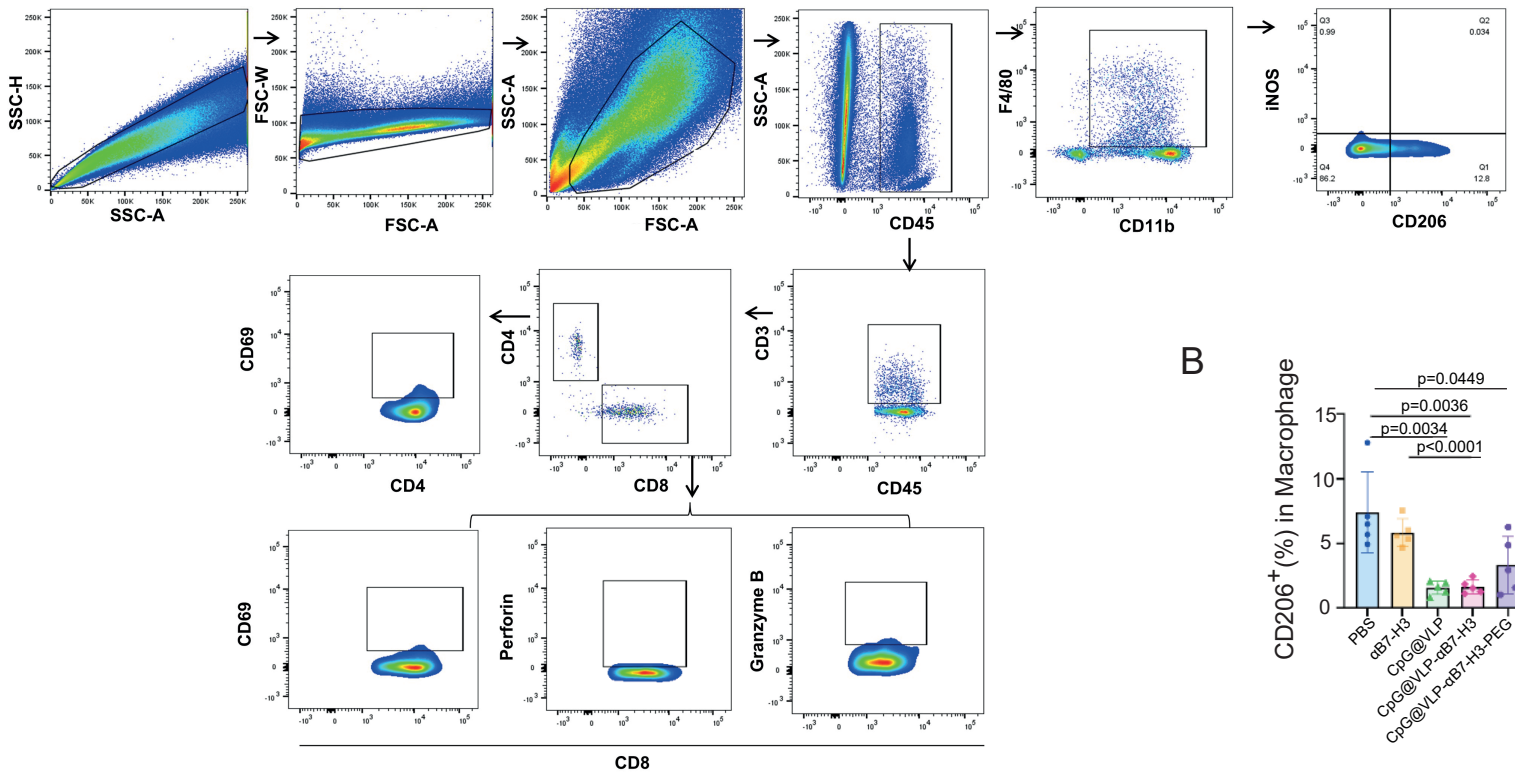

B

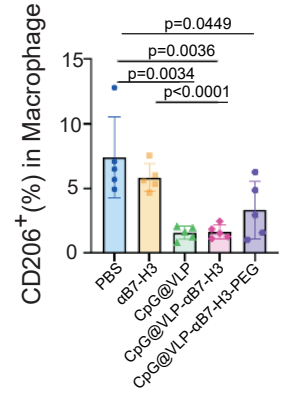

C

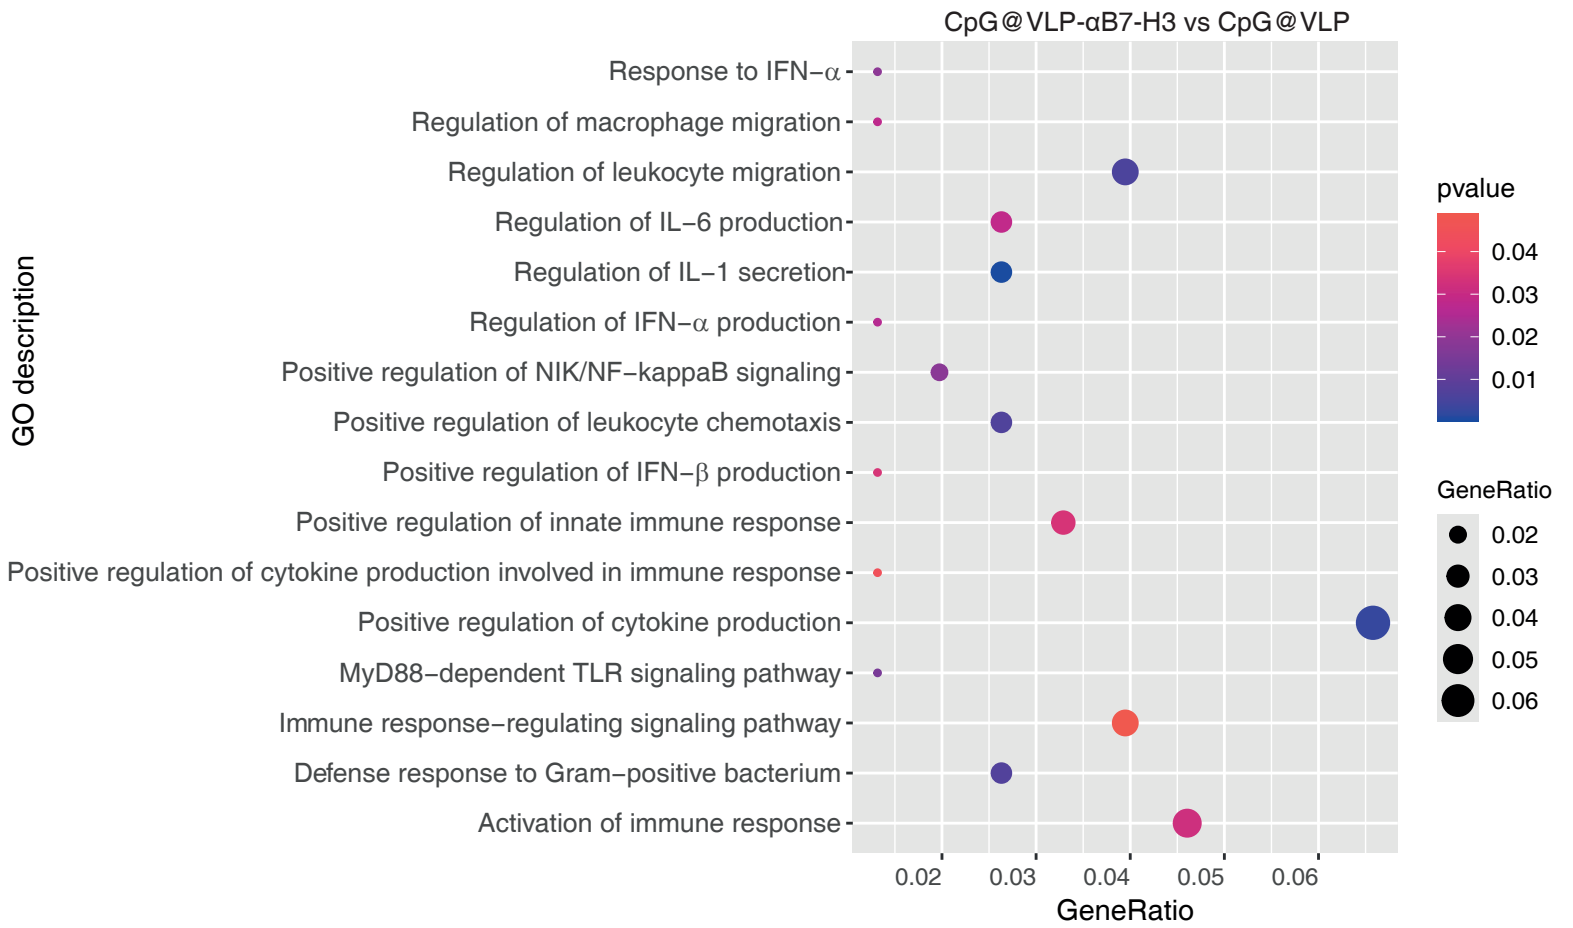

Figure S1 Tumor immune microenvironment remodeling after treatment with VLP nanovaccines.

(A) Flow cytometry gating strategy for tumor microenvironment. (B) The infiltration percentage  $CD206^+$  in macrophages at tumor tissue in each treatment group was measured by flow cytometry ( $n = 5$ ). Data were expressed as the mean  $\pm$  SD, and differences between two groups were tested using an unpaired, two-tailed Student's t-test.  $p$  values less than 0.05 were considered significant, with the corresponding value number specified. (C) GO enrichment scatter plot for upregulated transcriptome genes treated with CpG@VLP- $\alpha$ B7-H3 vs CpG@VLP in  $CD45^+$  cells sorting from tumor tissue ( $n = 3$ ). Genes with an adjusted  $p$  value less than 0.05 were identified as differentially expressed genes (DEGs). For GO enrichment analysis of the upregulated DEGs, GO terms with a  $p$  value less than 0.05 were considered significantly enriched.

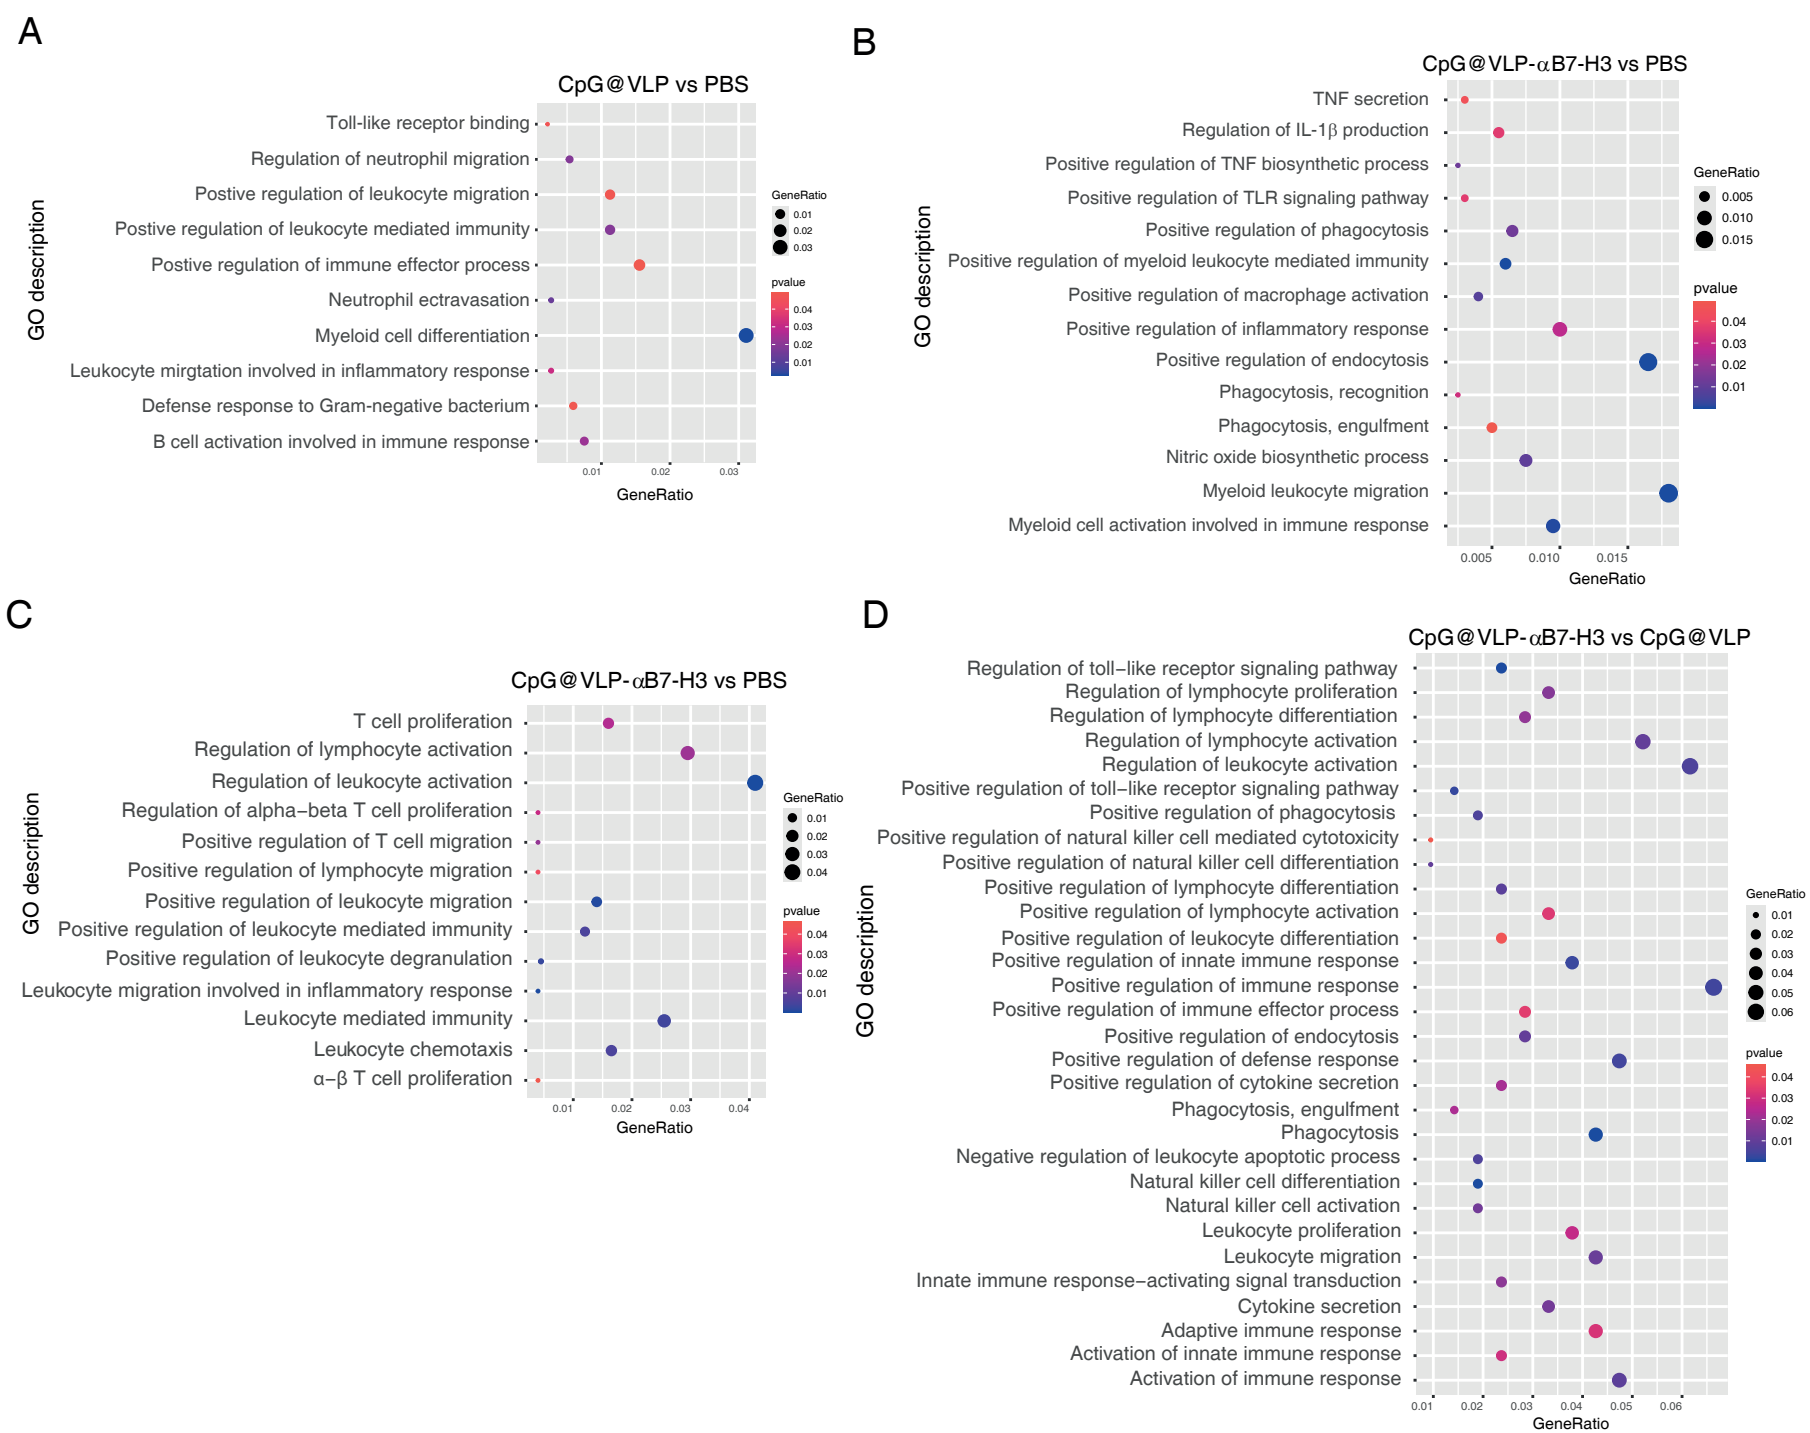

Figure S2 GO enrichment scatter plot for upregulated transcriptome genes treated with VLP nanovaccine in splenocytes.

(A) Myeloid cell differentiation of CpG@VLP vs PBS. (B) M1-like macrophage characteristics of CpG@VLP-αB7-H3 vs PBS.

(C) T cell activation characteristics of CpG@VLP-αB7-H3 vs PBS. (D) Leukocyte activation and positive regulation of the immune

response of CpG@VLP-αB7-H3 vs CpG@VLP. Genes with an adjusted p value less than 0.05 were identified as differentially expressed genes (DEGs). For GO enrichment analysis of the upregulated DEGs, GO terms with a p value less than 0.05 were considered significantly enriched (n = 3).
